# Supplementary material for: Phytochemical Engineering of Vanadium Pentoxide Nanoparticles via Neem Extract: A Sustainable Platform for Dual Antidiabetic–Anticancer Therapy
Source: Research Square preprint supplement (doi:10.21203/rs.3.rs-7985431/v1), 2025-12-05
Supplement: Supplementary file 1 [file a8815595c6adb99f80f9c90d.docx]

**Figure 1. UV–Vis Spectrum of Neem-mediated V₂O₅ Nanoparticles.**

**
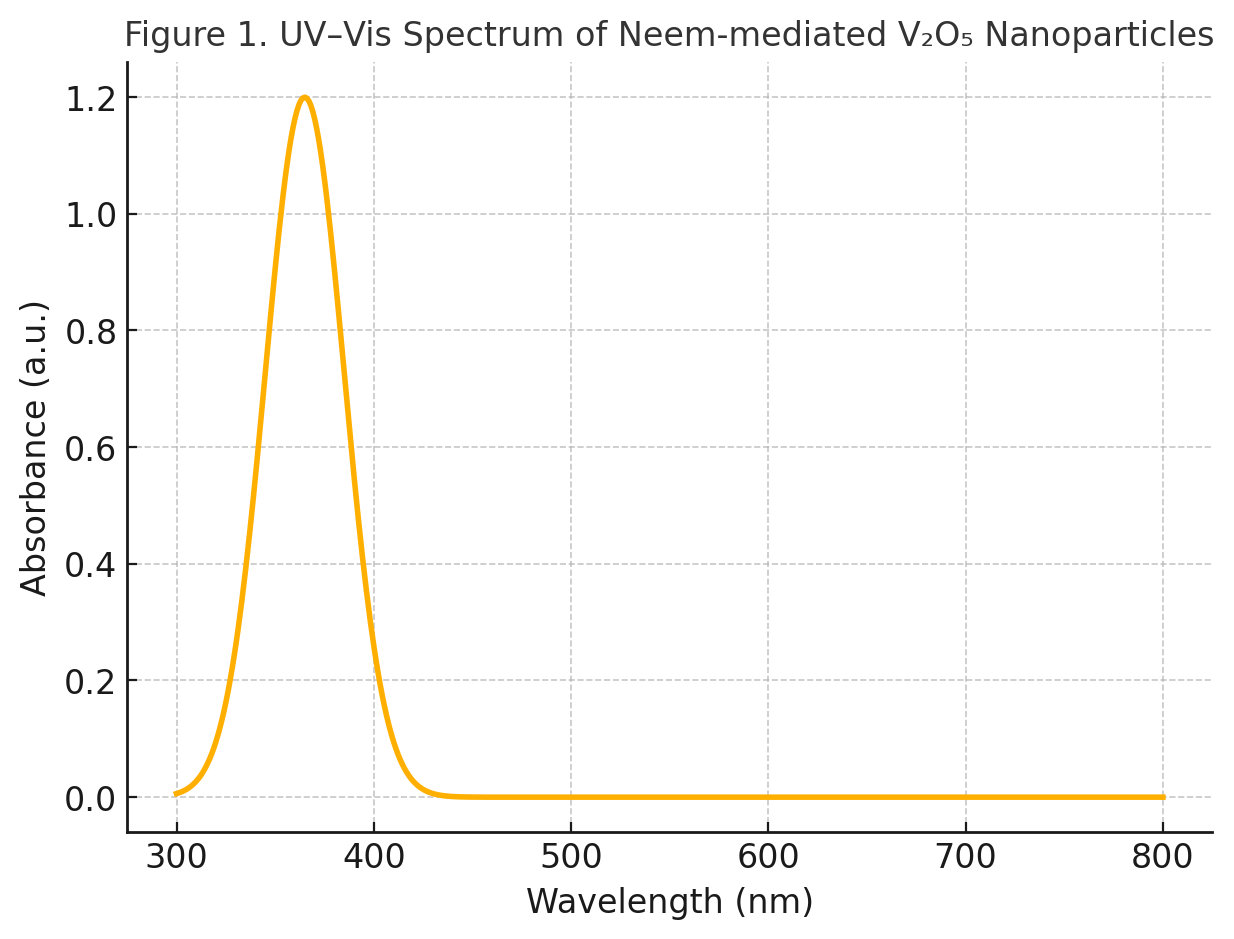
**

**Figure 2. FTIR Spectrum of V₂O₅ Nanoparticles**

**
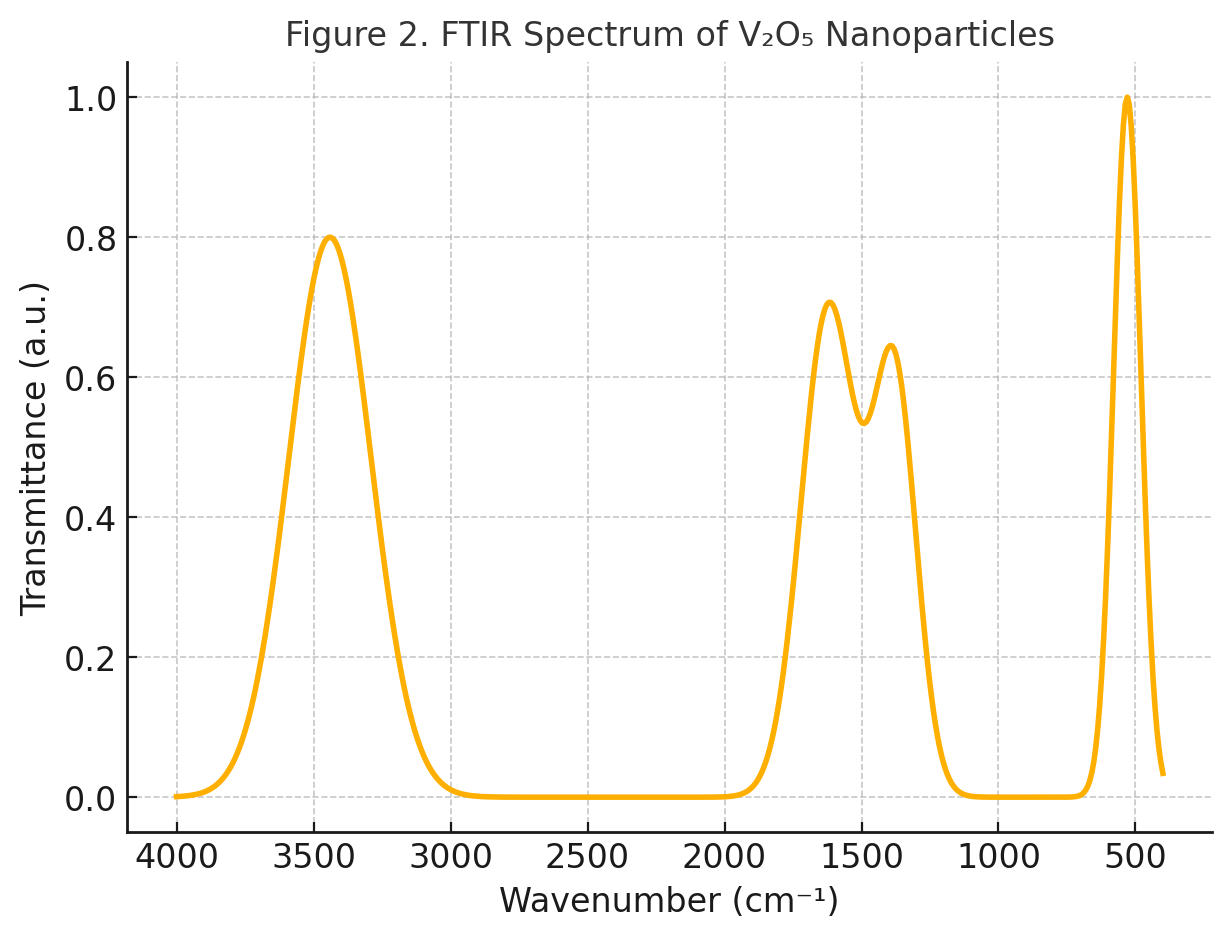
**

**Figure 3. XRD Pattern of Orthorhombic V₂O₅ Nanoparticles**

**
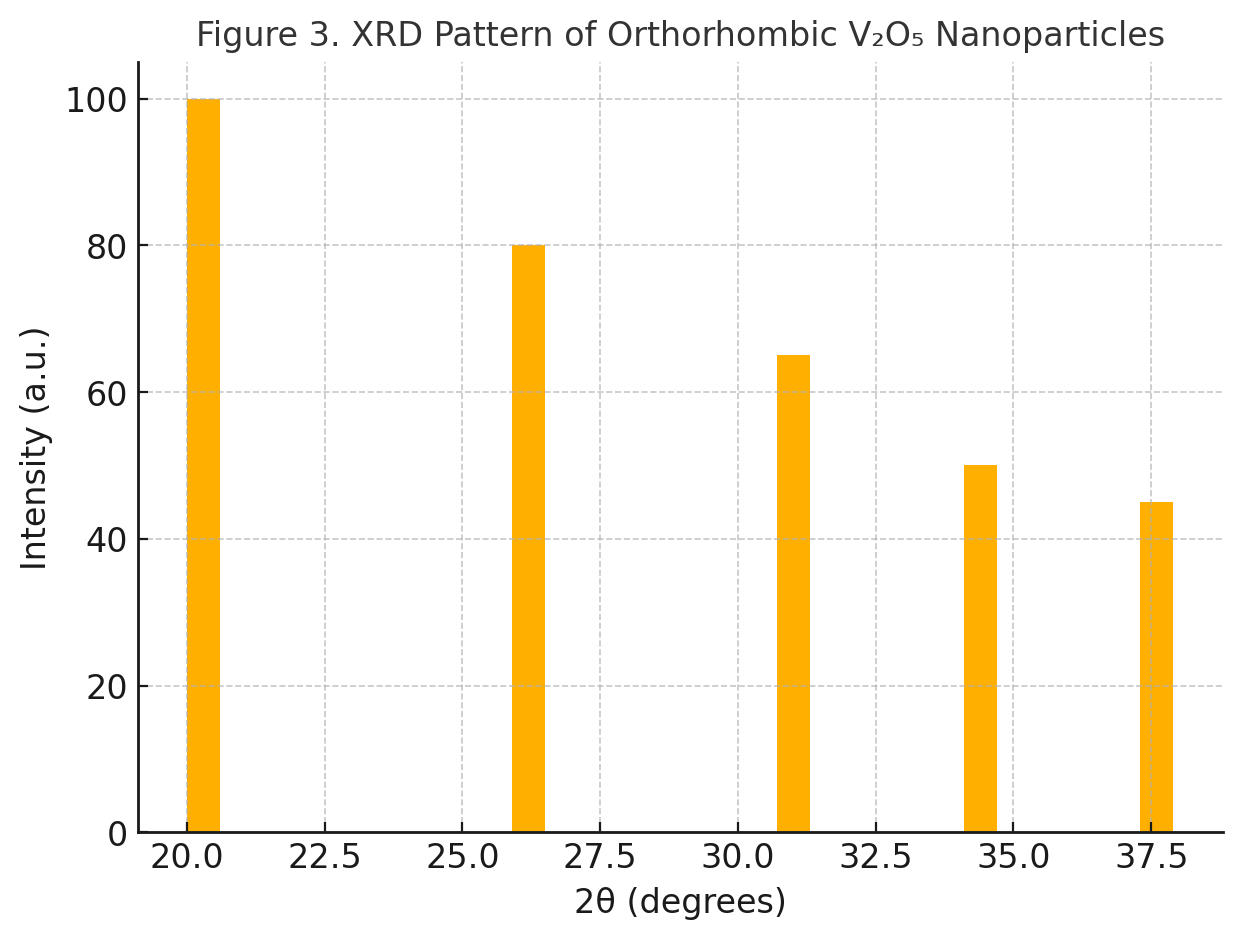
**

**Figure 4. Morphological and Colloidal Characterization of Neem-mediated V₂O₅ Nanoparticles**

**(a) *Scanning Electron Micrograph (SEM)* showing quasi-spherical V₂O₅ nanoparticles with slight agglomeration, indicating uniform morphology and effective stabilization by neem phytochemicals. Average particle size observed: 20–80 nm.**

**(b) *Transmission Electron Micrograph (TEM)* displaying well-dispersed nanoparticles with clear lattice fringes, confirming crystalline nature. The inset *Selected Area Electron Diffraction (SAED)* pattern exhibits concentric rings corresponding to orthorhombic V₂O₅ planes, validating high crystallinity.**

**
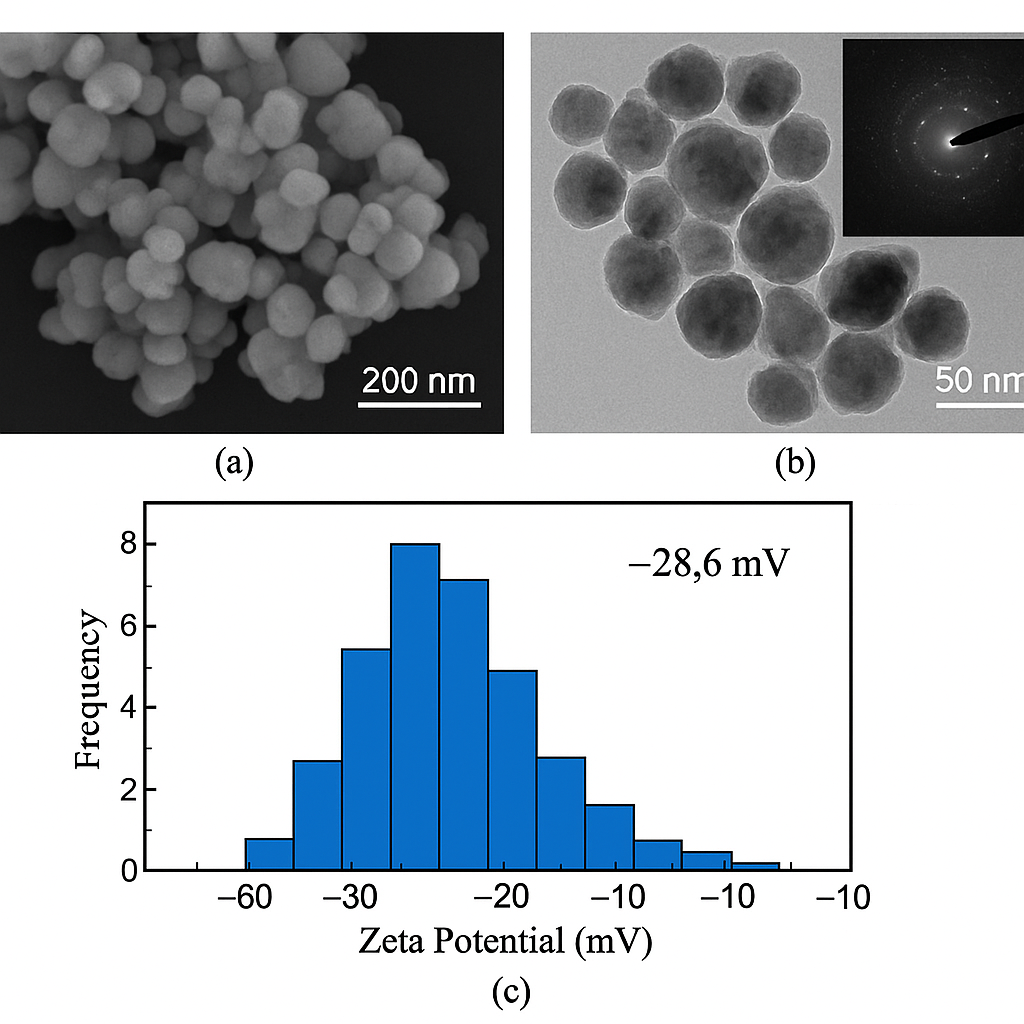
**

**Figure5: *Zeta Potential Distribution* of neem-derived V₂O₅ nanoparticles showing a prominent peak at –28.6 mV, indicating strong negative surface charge and excellent colloidal stability due to phytochemical capping.**

**
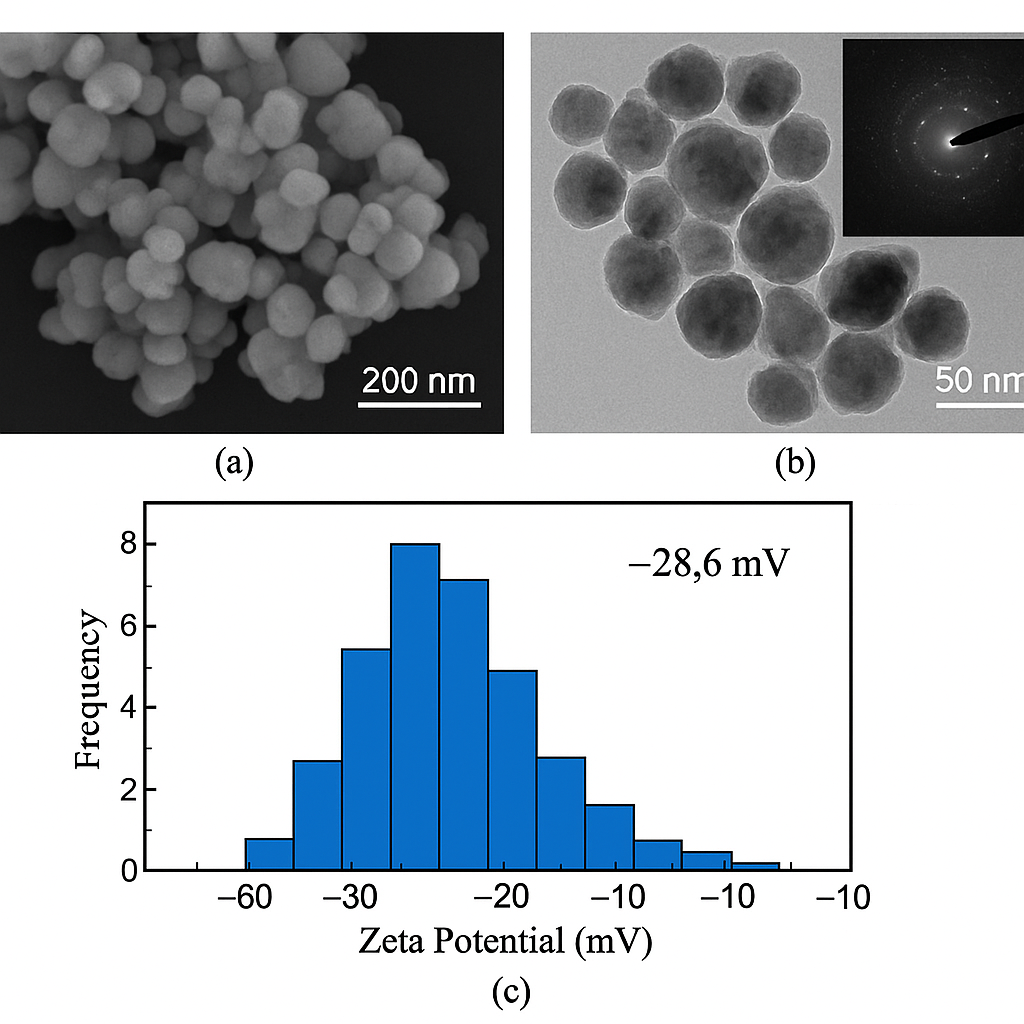
**

**Figure 6a. α-Amylase Inhibition Activity of V₂O₅ NPs**

**
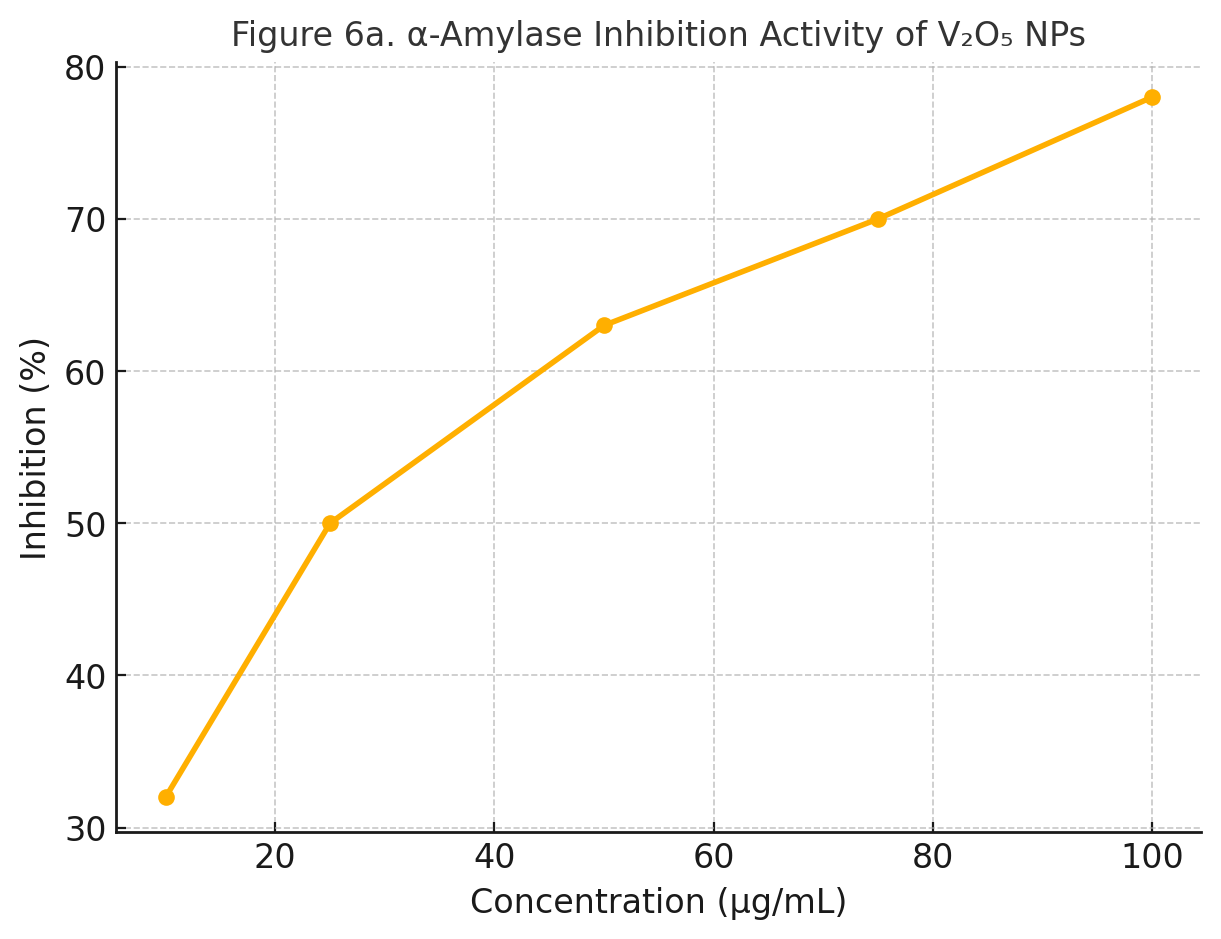
**

**Figure 6b. Cytotoxicity of V₂O₅ NPs against Cancer Cell Lines**

**
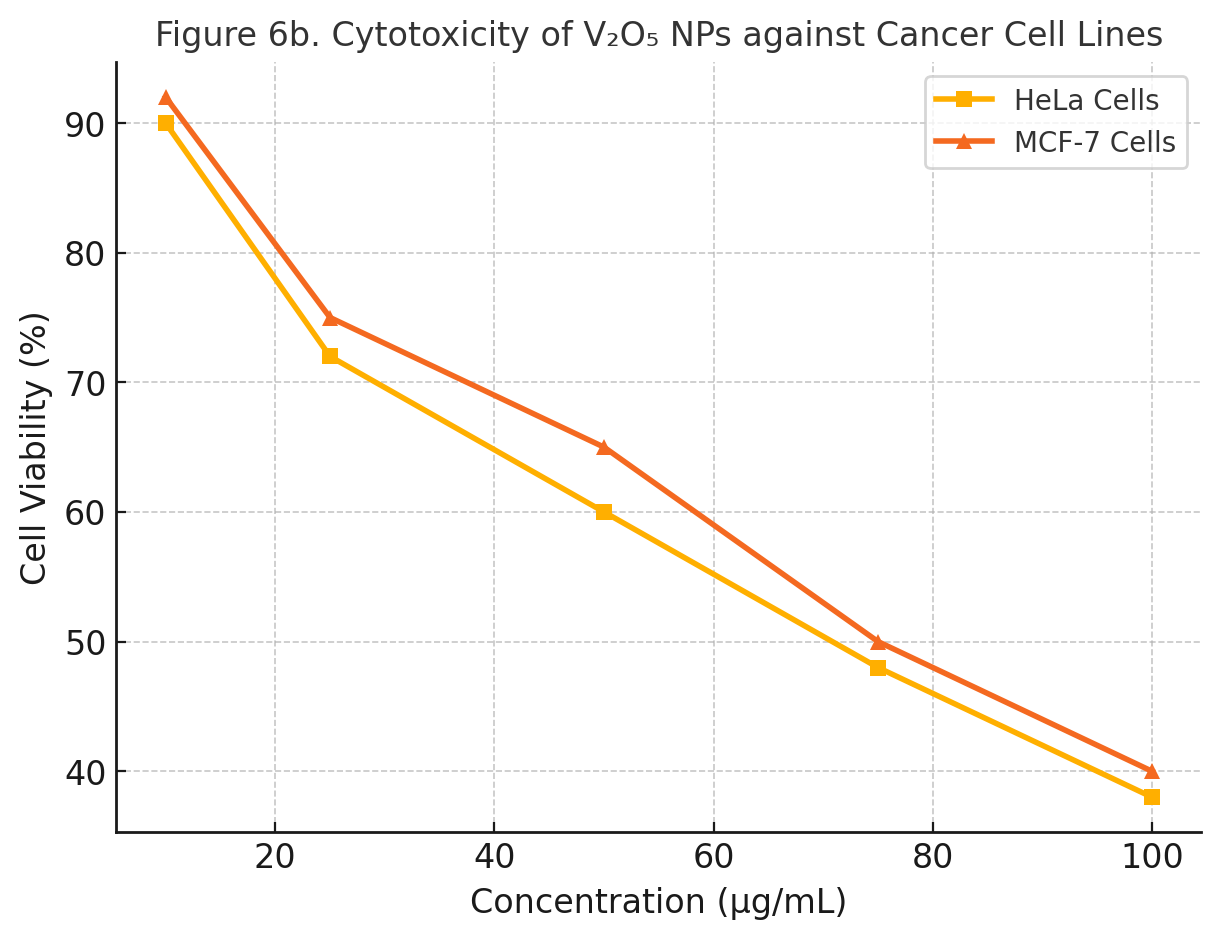
**
